# Supplementary material
Source: Springer Nature journal article supplement (https://www.springermedizin.de/resource/supplementary/12913_2013_2705_MOESM5_ESM.pdf/9531220)
Supplement: MOESM5 [file 9531220]

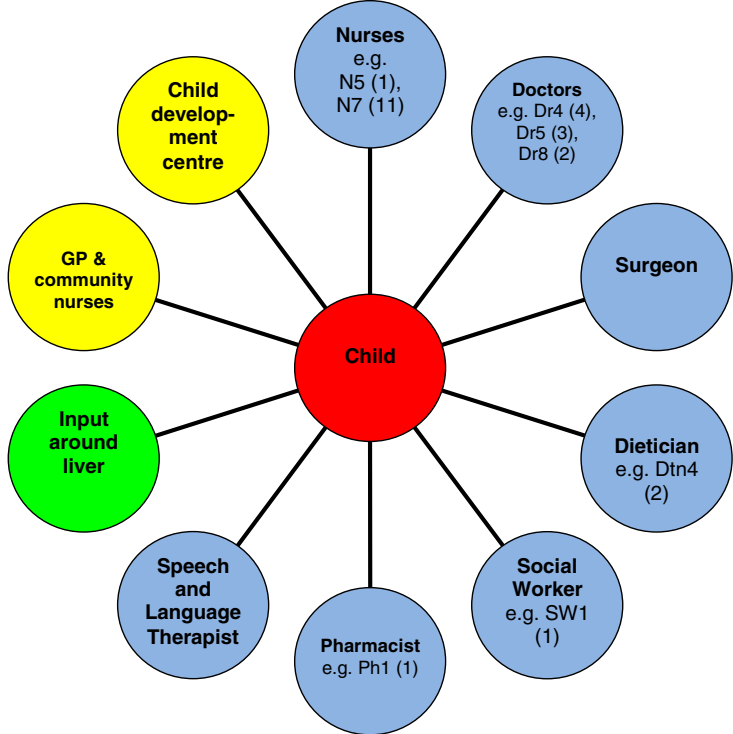

**Key:**

- = Renal team
- = Other hospital department
- = Community services

N5, Dr4 etc = professionals participating in the study; (number in brackets) = number of contacts RN had with each professional in relation to family 5
